# Supplementary material
Source: PubMed Central journal article supplement (PMC4439256)

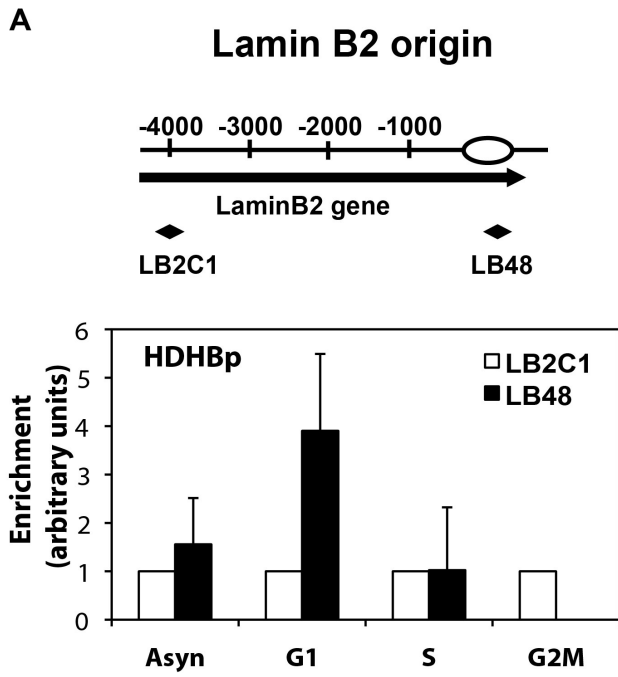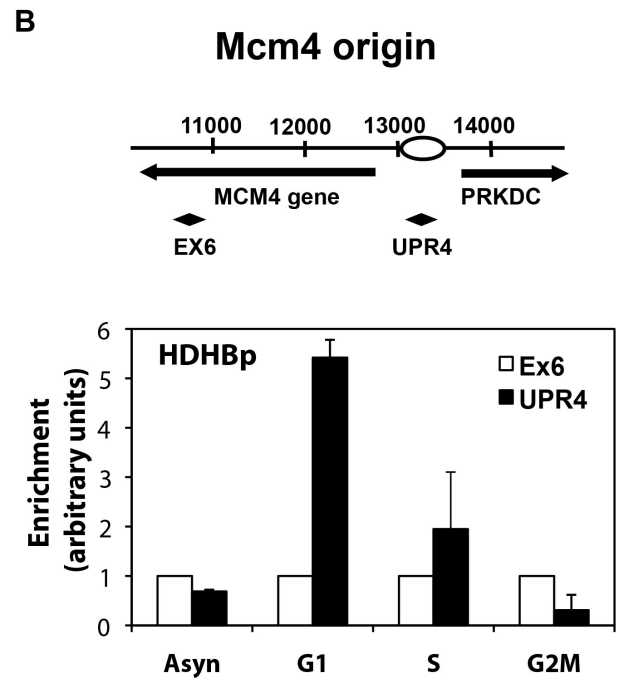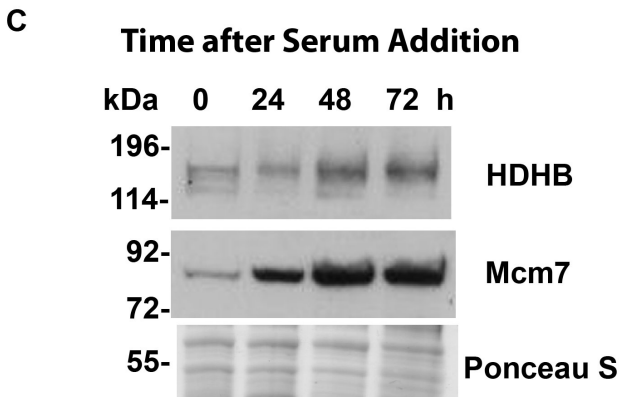

Suppl. Figure 2

Supplement: NIHMS686027-supplement-2.pdf [file NIHMS686027-supplement-2.pdf]
